# Supplementary material
Source: publisher figshare collection journal article supplement (https://osapublishing.figshare.com/ndownloader/files/12118025)
Supplement: Supplementary file 1 [file 12118025]

# Phantom
# Correlation coefficient table
# B6:W6: feature numbers
# A7:A28: feature numbers
	18	21	24	26	27	30	31	32	33	34	37	38	46	51	52	54	57	58	63	64	68	69
18	1	0.827	0.732	0.583	0.768	0.443	0.83	0.696	0.762	0.914	0.828	0.309	0.99	0.292	0.834	0.952	0.923	0.955	0.903	0.92	0.993	0.923
21	0.827	1	0.988	0.939	0.982	0.869	0.99	0.971	0.994	0.984	0.968	0.757	0.789	0.766	0.986	0.952	0.978	0.957	0.988	0.974	0.803	0.97
24	0.732	0.988	1	0.979	0.987	0.932	0.971	0.985	0.999	0.945	0.942	0.824	0.685	0.843	0.974	0.898	0.937	0.901	0.953	0.928	0.708	0.929
26	0.583	0.939	0.979	1	0.945	0.986	0.925	0.98	0.97	0.862	0.897	0.911	0.537	0.932	0.912	0.791	0.848	0.798	0.876	0.846	0.551	0.834
27	0.768	0.982	0.987	0.945	1	0.882	0.946	0.944	0.984	0.954	0.904	0.731	0.706	0.763	0.994	0.927	0.951	0.916	0.957	0.923	0.763	0.955
30	0.443	0.869	0.932	0.986	0.882	1	0.858	0.946	0.917	0.767	0.831	0.954	0.398	0.976	0.832	0.678	0.748	0.689	0.785	0.752	0.405	0.731
31	0.83	0.99	0.971	0.925	0.946	0.858	1	0.977	0.982	0.976	0.994	0.784	0.812	0.775	0.954	0.935	0.967	0.954	0.983	0.982	0.791	0.948
32	0.696	0.971	0.985	0.98	0.944	0.946	0.977	1	0.986	0.921	0.966	0.89	0.67	0.89	0.929	0.856	0.906	0.875	0.932	0.921	0.652	0.885
33	0.762	0.994	0.999	0.97	0.984	0.917	0.982	0.986	1	0.959	0.958	0.814	0.721	0.827	0.977	0.915	0.951	0.92	0.967	0.947	0.736	0.941
34	0.914	0.984	0.945	0.862	0.954	0.767	0.976	0.921	0.959	1	0.959	0.641	0.882	0.643	0.978	0.99	0.999	0.993	0.999	0.994	0.896	0.994
37	0.828	0.968	0.942	0.897	0.904	0.831	0.994	0.966	0.958	0.959	1	0.786	0.825	0.763	0.917	0.913	0.948	0.942	0.966	0.977	0.778	0.921
38	0.309	0.757	0.824	0.911	0.731	0.954	0.784	0.89	0.814	0.641	0.786	1	0.301	0.992	0.675	0.525	0.613	0.562	0.665	0.655	0.24	0.574
46	0.99	0.789	0.685	0.537	0.706	0.398	0.812	0.67	0.721	0.882	0.825	0.301	1	0.266	0.777	0.916	0.889	0.931	0.872	0.904	0.97	0.88
51	0.292	0.766	0.843	0.932	0.763	0.976	0.775	0.89	0.827	0.643	0.763	0.992	0.266	1	0.702	0.532	0.618	0.557	0.667	0.643	0.236	0.588
52	0.834	0.986	0.974	0.912	0.994	0.832	0.954	0.929	0.977	0.978	0.917	0.675	0.777	0.702	1	0.963	0.978	0.952	0.979	0.951	0.83	0.982
54	0.952	0.952	0.898	0.791	0.927	0.678	0.935	0.856	0.915	0.99	0.913	0.525	0.916	0.532	0.963	1	0.994	0.995	0.984	0.977	0.946	0.997
57	0.923	0.978	0.937	0.848	0.951	0.748	0.967	0.906	0.951	0.999	0.948	0.613	0.889	0.618	0.978	0.994	1	0.995	0.998	0.99	0.909	0.997
58	0.955	0.957	0.901	0.798	0.916	0.689	0.954	0.875	0.92	0.993	0.942	0.562	0.931	0.557	0.952	0.995	0.995	1	0.99	0.992	0.938	0.99
63	0.903	0.988	0.953	0.876	0.957	0.785	0.983	0.932	0.967	0.999	0.966	0.665	0.872	0.667	0.979	0.984	0.998	0.99	1	0.994	0.882	0.99
64	0.92	0.974	0.928	0.846	0.923	0.752	0.982	0.921	0.947	0.994	0.977	0.655	0.904	0.643	0.951	0.977	0.99	0.992	0.994	1	0.89	0.977
68	0.993	0.803	0.708	0.551	0.763	0.405	0.791	0.652	0.736	0.896	0.778	0.24	0.97	0.236	0.83	0.946	0.909	0.938	0.882	0.89	1	0.918
69	0.923	0.97	0.929	0.834	0.955	0.731	0.948	0.885	0.941	0.994	0.921	0.574	0.88	0.588	0.982	0.997	0.997	0.99	0.99	0.977	0.918	1
